# Supplementary material for: Lytic Polysaccharide Monooxygenases as Chitin-Specific Virulence Factors in Crayfish Plague
Source: MDPI journal article supplement (doi:10.3390/biom11081180), 2021-08-09
Supplement: s1 [file s1]

**Supplementary Materials for:**

# **Lytic polysaccharide monooxygenases as chitin-specific virulence factors in crayfish plague**

**Federico Sabbadin <sup>1,\*</sup>, Bernard Henrissat <sup>2,3</sup>, Neil C. Bruce <sup>1</sup> and Simon J. McQueen-Mason <sup>1,\*</sup>**

1 Centre for Novel Agricultural Products, Department of Biology, University of York,  
York YO10 5DD, UK; neil.bruce@york.ac.uk

2 DTU Bioengineering, Technical University of Denmark, Søtofts Plads, 2800 Kongens  
Lyngby, Denmark; bernard.henrissat@gmail.com

3 Department of Biological Sciences, King Abdulaziz University, Jeddah 21589, Saudi  
Arabia

\* Correspondence: federico.sabbadin@york.ac.uk (F.S.); simon.mcqueenmason@york.ac.uk  
(S.J.M.-M.)

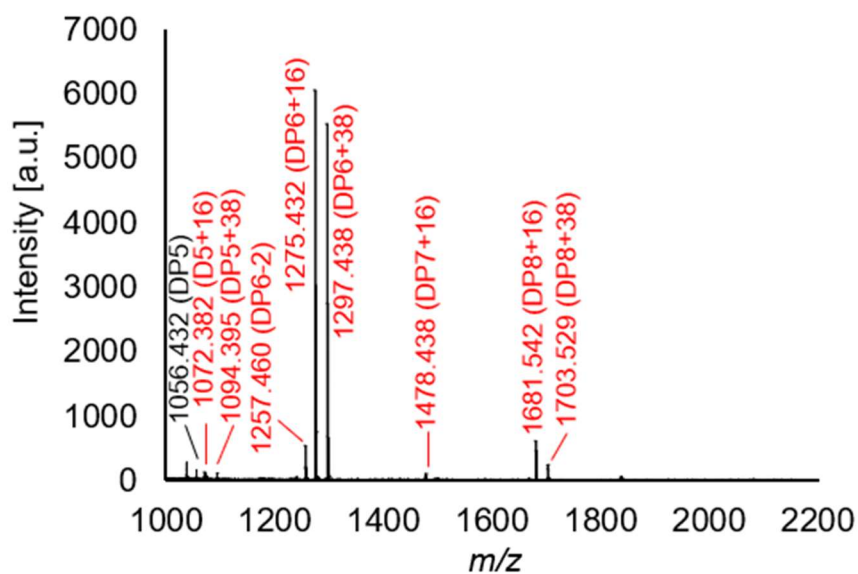

**Figure S1. MALDI-TOF MS of activity assays of *AaAA15a* with  $\alpha$ -chitin.**

MALDI-TOF MS analysis of in vitro activity assays with purified *AaAA15A*, under the same experimental conditions as in Figure 5 e and f. The panel show the spectrum of products obtained after incubation of 4 mg mL<sup>-1</sup>  $\alpha$ -chitin with 2  $\mu$ M *AaAA15A* and 4 mM gallic acid. The main peaks correspond to mono- or di-sodiated adducts of C1-aldonic acids, imparting +16 or +38 m/z respectively, relative to the mono-sodiated unoxidized form. Native and oxidised species are marked in black and red, respectively.
